# Supplementary material for: An elusive vinyl radical isolated as an appended unit in a five-coordinate Co(iii)–bis(iminobenzosemiquinone) complex formed via ligand-centered C–S bond cleavage
Source: Royal Society of Chemistry journal article supplement (doi:10.1039/c6cc02751b), 2016-01-01
Supplement: c6cc02751b1.pdf [file c6cc02751b1.pdf]

# **An Elusive Vinyl Radical Isolated as an Appended Unit in a Five-Coordinate Co(III)–Bis(Iminobenzosemiquinone) Complex Formed *via* Ligand–Centered C–S Bond Cleavage**

Prasenjit Sarkar,<sup>a</sup> Archana Tiwari,<sup>b</sup> Amrit Sarmah,<sup>c</sup> Subhrajyoti Bhandary,<sup>d</sup> Ram Kinkar Roy<sup>c</sup> and Chandan Mukherjee<sup>a\*</sup>

**\*Corresponding address:**

Dr. Chandan Mukherjee, Department of Chemistry, Indian Institute of Technology Guwahati, Guwahati, 781039, Assam, India

Email: [cmukherjee@iitg.ernet.in](mailto:cmukherjee@iitg.ernet.in)

Phone No. +91-361-258-2327

Fax: +91-361-258-2349

| <b>Contents</b>                                                                                                      | <b>Page</b> |
|----------------------------------------------------------------------------------------------------------------------|-------------|
| Materials and Methods                                                                                                | S3          |
| Syntheses                                                                                                            | S3-S4       |
| IR, mass, <sup>1</sup> H and <sup>13</sup> C NMR spectrum of the ligand                                              | S5-S6       |
| IR Mass and UV-Vis/NIR Spectrum of complex <b>1</b>                                                                  | S7-S8       |
| Shift in <sup>1</sup> H NMR spectrum of CDCl <sub>3</sub> solvent peak in Evan's method magnetic moment measurement. | S8          |
| Optimized structure of the complex at PBEPBE/def2-TZVP level.                                                        | S9          |
| Electrostatic potential plot computed at PBEPBE/def2-TZVP level                                                      | S9          |
| Proposed mechanism for the formation of complex <b>1</b>                                                             | S10         |
| Selected bond distances (Å) and bond angles (°) for complex <b>1</b>                                                 | S10         |
| Crystallographic refinement Parameters                                                                               | S11         |
| Coordinated for the geometrically optimized structure                                                                | S11-S15     |
| References                                                                                                           | S15         |

## EXPERIMENTAL SECTION:

**Materials:** All the chemicals and solvents were obtained from commercial sources and were used as supplied, unless noted otherwise. 3,5-di-*tert*-butylcatechol, 2-aminothiophenol, and 1,2-dibromoethane were purchased from Sigma-Aldrich. Solvents were obtained from Merck (India). Mass spectra were measured in HPLC grade acetonitrile solution.

**Physical methods:** X-ray crystallographic data were collected using Super Nova, Single source at offset, Eos diffractometer. The data refinement and cell reductions were carried out by CrysAlisPro.<sup>1a</sup> Structures were solved by direct methods using SHELXS-97 and refined by the full matrix least squares method using SHELXL 2014<sup>1b</sup> present in the program suite WinGX (version 2014.1)<sup>1c</sup>. All the non-hydrogen atoms were refined anisotropically. All hydrogen atoms (except H22A/H22B) were positioned geometrically and refined isotropically using a riding model with  $U_{\text{iso}}(\text{H}) = 1.2U_{\text{eq}}[\text{C}]$ ,  $U_{\text{iso}}(\text{H}) = 1.5U_{\text{eq}}$  (methyl groups). C22A/C22B - bound H atoms were located using difference Fourier maps, but in the final refinement their distances were constrained at 0.97 Å (DFIX). IR spectra were recorded on a Perkin Elmer Instrument at normal temperature with KBr pellet by grinding the sample with KBr (IR Grade). <sup>1</sup>H-, and <sup>13</sup>C-NMR spectra of the ligand were recorded in BRUKER 600 MHz NMR machine. UV-Vis spectra were recorded on a Perkin Elmer, Lambda 750, UV/VIS/NIR spectrometer by preparing a known concentration of the samples in HPLC Grade CH<sub>2</sub>Cl<sub>2</sub> at room temperature (25 °C) using a cuvette of 1 cm width. Mass spectral (MS) data were obtained from quadrupole time-of-flight (QTOF)-MS spectrometer ('Waters, Model: Q-ToF Premier') and peaks are given in *m/z* (% of basis peak). Magnetic susceptibility of the complex in solution was measured using Evan's method at 400 MHz NMR machine (Varian, Model: Mercury plus). Variable temperature magnetic susceptibility measurements for the complex were performed using superconducting quantum interference device (SQUID) magnetometer at 1 T. Simulations of the experimentally obtained magnetic measurements were performed using *julX* programme developed by Dr. E. Bill, Max-Planck Institute, Muelheim an der Ruhr, Germany.

**Computational Details:** All DFT calculations are performed using Gaussian09<sup>2</sup> program suit. The initial geometry optimization is performed at M06<sup>3</sup>/6-31+G(d,p) and subjected for further optimization using the PBE functional (exchange and correlation) (PBEPBE)<sup>4</sup> in conjunction with an uncontracted Ahlrichs def2-TZVP<sup>5</sup> basis set. Subsequently, frequency calculations are also performed at the same level (*i.e.*, PBEPBE/def2-TZVP). The natural bond orbital (NBO) analysis<sup>6</sup> is performed to understand the bonding nature of the atoms as implemented in Gaussian09.

## Syntheses:

**Synthesis of 1,2-Bis(2-aminophenylthio)ethane:** Same as previously been reported.<sup>7</sup>

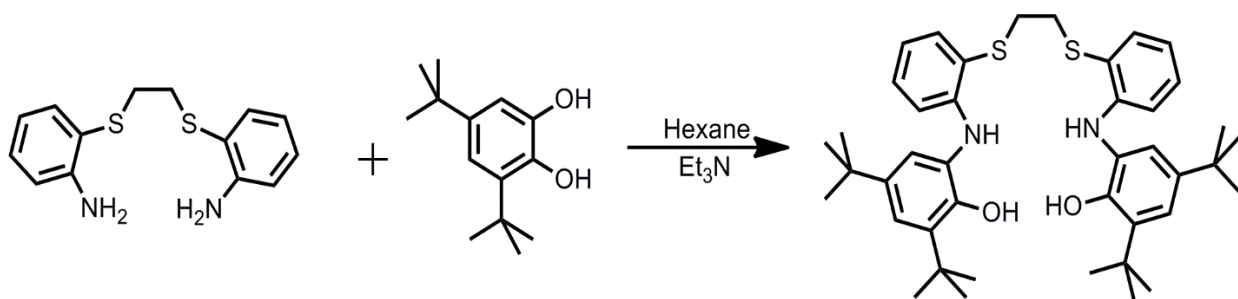

**Synthesis of  $[\text{C}_{42}\text{H}_{56}\text{N}_2\text{O}_2\text{S}_2]$ ,  $\text{H}_4\text{Pra}^{\text{edt}(\text{AP}/\text{AP})}$ :** To a solution of 1,2-bis(aminophenylthio)ethane (1.10 gm, 4 mmol) and 3,5-di-*tert*-butylcatechol (2.22 g, 10 mmol) in hexane (30 mL),  $\text{Et}_3\text{N}$  (0.1 mL) was added. The solution was refluxed for 24 h. During this period a brown color precipitate was added. The solution was refluxed for 24 h. During this period a brown color precipitate was appeared. The resulting suspension was further stirred at room temperature (25 °C) for 2 h. Thus formed precipitate was filtered and washed with methanol thoroughly. The solid was dried under high vacuum. Yield: 1.947 g, 71%. FTIR (KBr pellet  $\text{cm}^{-1}$ ): 3379, 3297, 2955, 2907, 2867, 1586, 1476, 1448, 1420, 1362, 1310, 1222, 1201, 1157, 1126, 1117, 1057, 1035, 974, 881, 823, 810, 754, 676, 620.  $^1\text{H}$  NMR ( $\text{CDCl}_3$ , 600MHz):  $\delta$  7.44 (s, 2H), 7.24 (d,  $J = 2.2$  Hz, 2H), 7.13 (t,  $J = 7.7$  Hz, 2H), 6.97 (d,  $J = 2.1$  Hz, 2H), 6.77 (t,  $J = 7.5$  Hz, 2H), 6.47 (d,  $J = 7.6$  Hz, 2H), 6.38 (s, 2H), 6.20 (s, 2H), 3.02 (s, 4H), 1.44 (s, 18H), 1.25 (s, 18H).  $^{13}\text{C}$  NMR (151 MHz,  $\text{CDCl}_3$ ):  $\delta$  149.66, 148.72, 142.56, 136.15, 135.62, 130.62, 127.55, 122.47, 121.82, 119.8, 118.04, 114.13, 77.43, 77.22, 77.01, 35.22, 34.95, 34.57, 31.78, 29.71. ESI-MS (+)  $m/z$  for  $[\text{C}_{42}\text{H}_{56}\text{N}_2\text{O}_2\text{S}_2+\text{H}]^+$ : calcd, 685.3855; found, 685.3983.

**Synthesis of  $[\text{C}_{42}\text{H}_{50}\text{N}_2\text{O}_2\text{S}_2\text{Co}]$ :** To the stirred solution of  $\text{H}_4\text{Pra}^{\text{edt}(\text{AP}/\text{AP})}$  (154 mg, 0.225 mmol) in methanol (15 mL),  $\text{Co}(\text{OAc})_2 \cdot 2\text{H}_2\text{O}$  (56 mg, 0.225 mmol) was added followed by dropwise addition of  $\text{Et}_3\text{N}$  (0.1 mL). The resulting solution was stirred at room temperature (25 °C) for 24 h under air. A deep violet precipitate appeared which was filtered and washed thoroughly with methanol. Recrystallization of the solid from a  $\text{CHCl}_3$ :MeOH (4:1) solvent mixture provided crystalline compound, which was suitable for single crystal X-ray analysis. Yield: 98 mg, 51% (including 1  $\text{CHCl}_3$ ). FTIR (KBr pellet  $\text{cm}^{-1}$ ): 3434, 3050, 2955, 2905, 2866, 1587, 1523, 1461, 1386, 1361, 1328, 1265, 1249, 1201, 1174, 1110, 1060, 1025, 996, 885, 859, 822, 756, 741, 665, 647, 538. ESI-MS (+)  $m/z$  for  $[\text{C}_{42}\text{H}_{50}\text{N}_2\text{O}_2\text{S}_2\text{Co}+\text{H}]^+$ : calcd, 738.27; found, 738.14. Anal. Calcd for  $\text{C}_{42}\text{H}_{50}\text{N}_2\text{O}_2\text{S}_2\text{Co} \cdot 1\text{CHCl}_3 \cdot 2.6\text{H}_2\text{O}$ : C, 56.95; H, 5.88; N, 2.88. Found: C, 57.20; H, 6.27; N, 3.10.

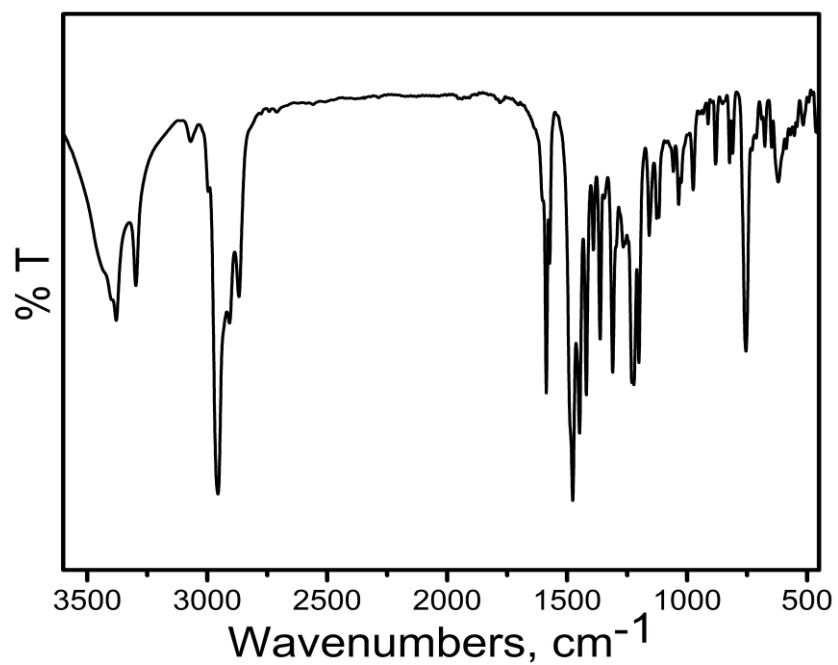

**Figure S1:** IR spectrum of  $\text{H}_4\text{Pra}^{\text{edt}(\text{AP}/\text{AP})}$ .

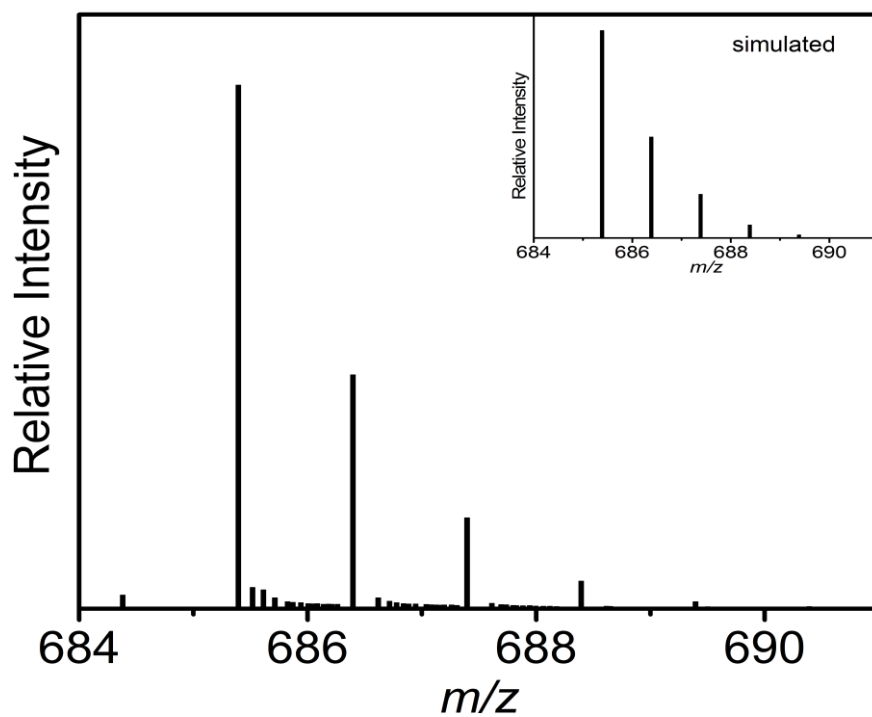

**Figure S2.** Experimental and simulated mass spectra for  $\text{H}_4\text{Pra}^{\text{edt}(\text{AP}/\text{AP})} + \text{H} = [\text{C}_{40}\text{H}_{52}\text{N}_2\text{O}_2\text{S}_2 + \text{H}]^+$  have been shown.

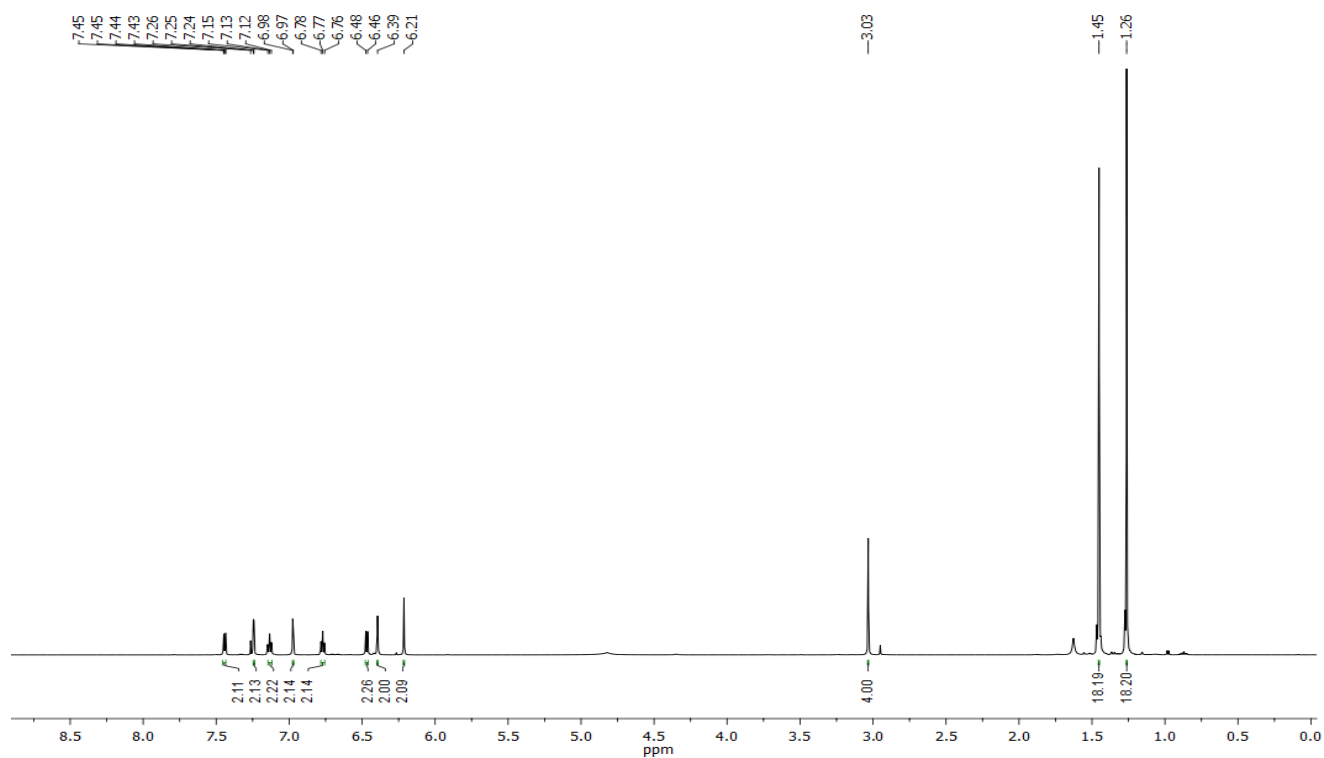

**Figure S3:**  $^1\text{H-NMR}$  spectrum of  $\text{H}_4\text{Pra}^{\text{edt(AP/AP)}}$ .

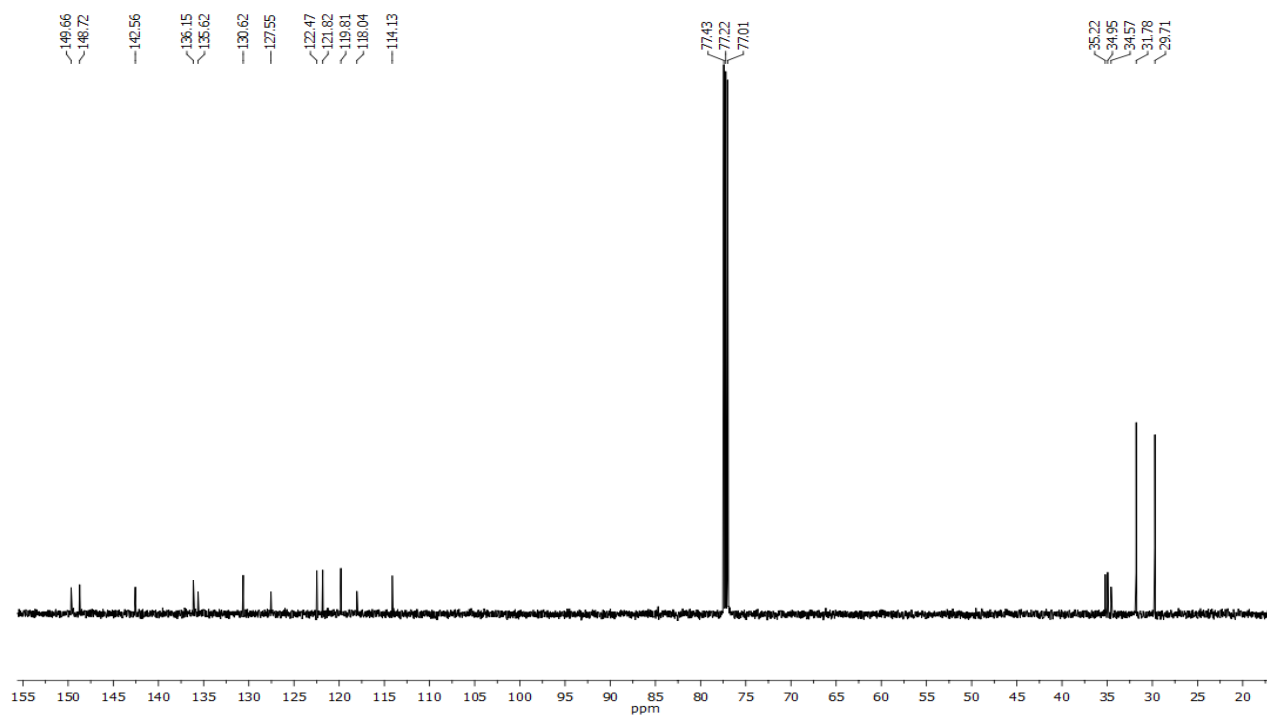

**Figure S4:**  $^{13}\text{C-NMR}$  spectrum of  $\text{H}_4\text{Pra}^{\text{edt(AP/AP)}}$ .

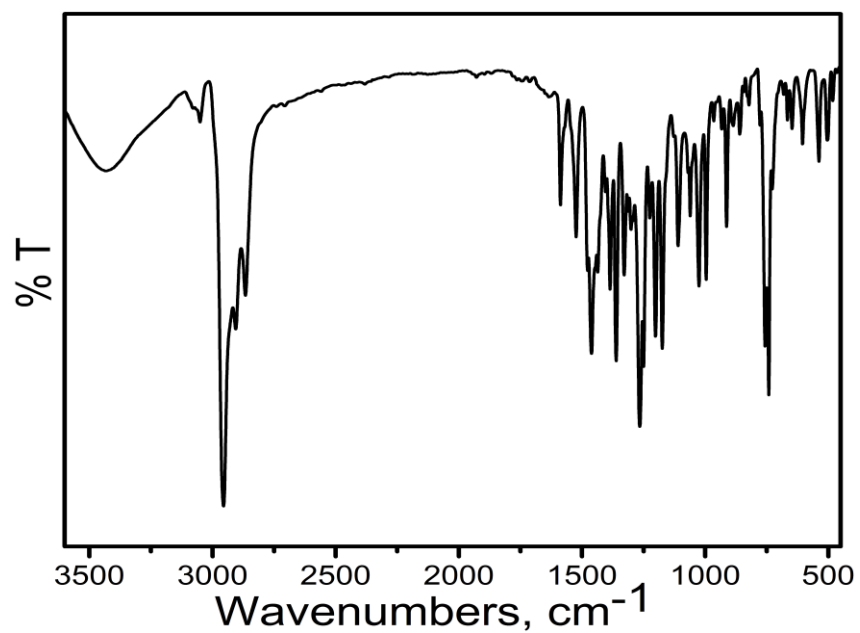

**Figure S5:** IR spectrum of complex **1**,  $C_{42}H_{50}N_2O_2S_2Co$ .

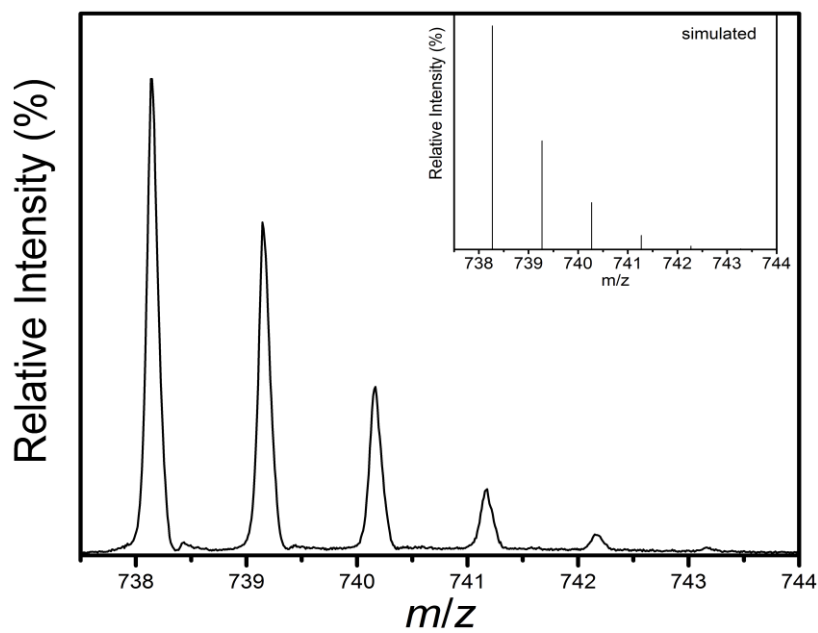

**Figure S6.** Experimental and simulated mass spectra for complex  $1+H = [C_{42}H_{50}N_2O_2S_2Co+H]^+$  have been shown.

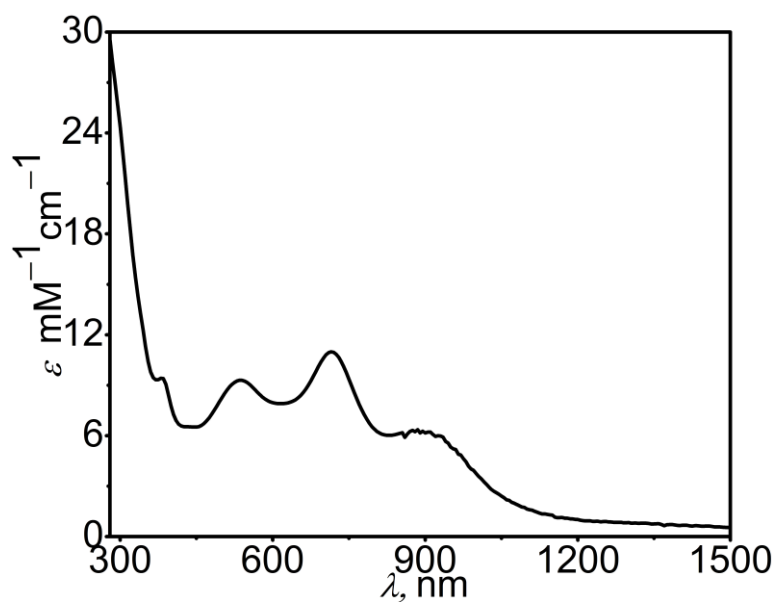

**Figure S7:** UV spectrum of complex **1** in CH<sub>2</sub>Cl<sub>2</sub> at 25 °C.

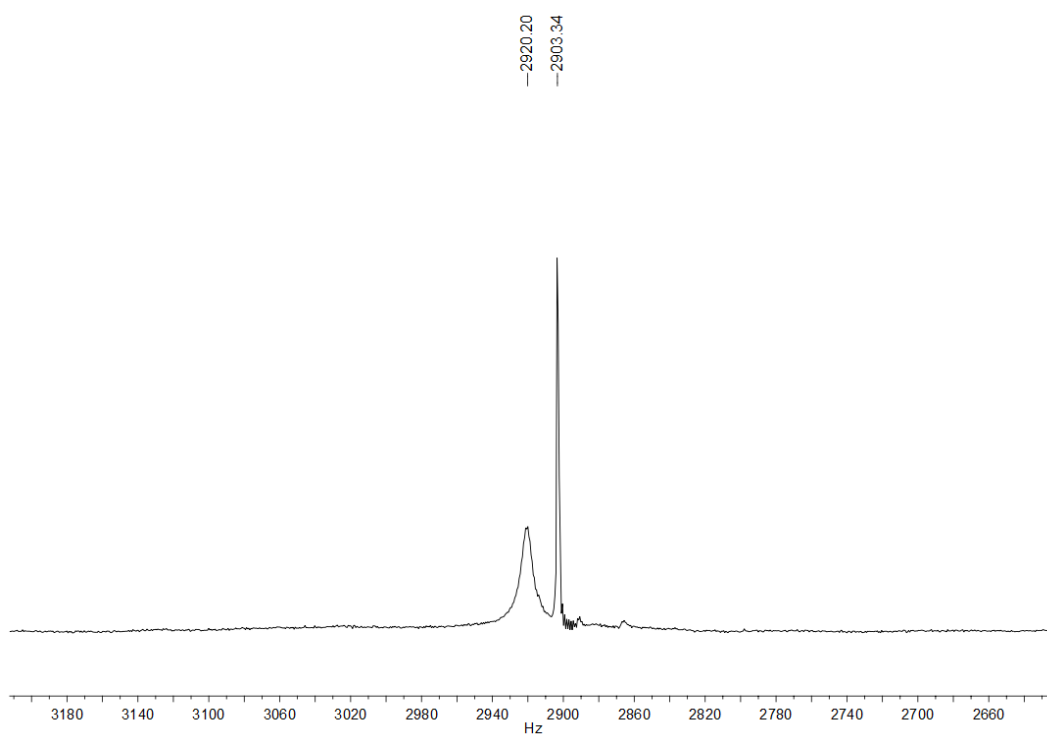

**Figure S8:** Showing NMR shift in solvent peak (CDCl<sub>3</sub>) during Evan's method magnetic susceptibility measurement of complex **1**•1CHCl<sub>3</sub> at 25 °C. *c* = 15 mg/mL.



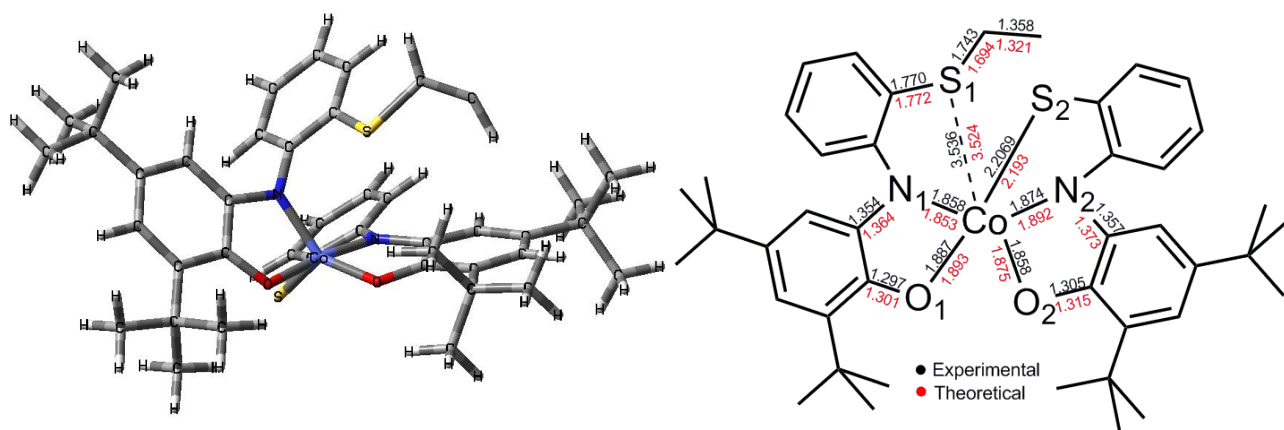

**Figure S9:** Optimized structure of the complex at PBE/PBE/def2-TZVP level.

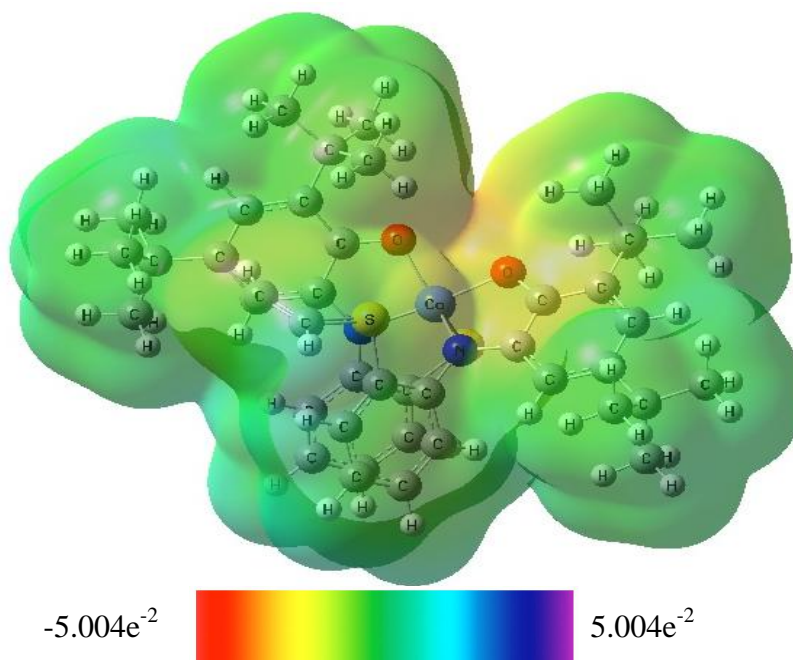

**Figure S10:** Electrostatic potential plot computed at PBE/PBE/def2-TZVP level (Iso-value = 0.03).

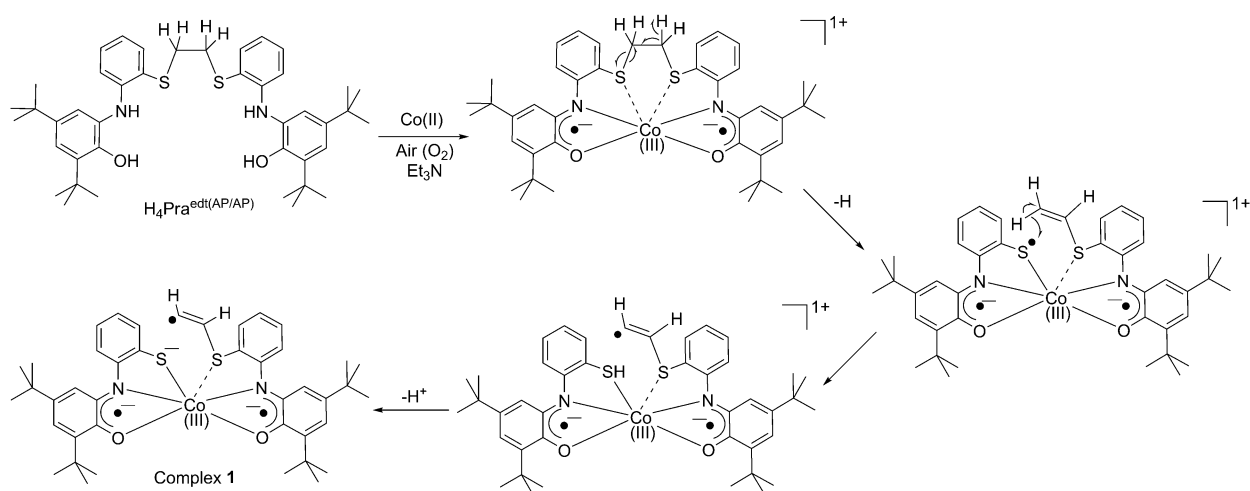

**Figure S11:** Showing proposed mechanism for the formation of complex **1**.

**Table S1:** Selected bond distances (Å) and bond angles (°) for complex **1**.

|            |             |            |            |
|------------|-------------|------------|------------|
| Co1–N1     | 1.858(3)    | O1–C2      | 1.297(4)   |
| Co1–O2     | 1.858(2)    | O2–C28     | 1.305(4)   |
| Co1–N2     | 1.874(3)    | N2–C23     | 1.357(4)   |
| Co1–O1     | 1.887(2)    | N2–C37     | 1.396(4)   |
| Co1–S2     | 2.2069 (12) | N1–C1      | 1.354(4)   |
| S2–C42     | 1.743(4)    | N1–C15     | 1.426(4)   |
| S1–C21A    | 1.756(13)   | C24–C25    | 1.357(4)   |
| S1–C21B    | 1.743(8)    | C22A–C21A  | 1.354(18)  |
| S1–C20     | 1.770(4)    | C37–C38    | 1.393(6)   |
| C27–C26    | 1.370(5)    | C27–C28    | 1.424(5)   |
| C24–C23    | 1.420(4)    | C2–C3      | 1.429(4)   |
| C25–C26    | 1.423(5)    | C1–C6      | 1.408(4)   |
| C28–C23    | 1.425(5)    | C4–C5      | 1.433(5)   |
| C2–C1      | 1.430(5)    | C22B–C21B  | 1.358(15)  |
| C3–C4      | 1.369(5)    | C5–C6      | 1.357(5)   |
|            |             |            |            |
| N1–Co1–O2  | 129.75(12)  | O2–Co1–N2  | 83.68(10)  |
| N1–Co1–N2  | 101.94(11)  | N1–Co1–O1  | 83.43(11)  |
| O2–Co1–O1  | 92.65(10)   | N2–Co1–O1  | 174.63(11) |
| N1–Co1–S2  | 98.76(9)    | O2–Co1–S2  | 131.47(9)  |
| N2–Co1–S2  | 84.99 (9)   | O1–Co1–S2  | 94.58(9)   |
| C42–S2–Co1 | 95.12(13)   | C2–O1–Co1  | 113.5(2)   |
| C23–N2–Co1 | 114.1(2)    | C37–N2–Co1 | 117.6(2)   |
| C28–O2–Co1 | 113.8(2)    |            |            |

**Table S2:** Crystallographic parameters and refinement data for complex 1.

|                                                        |                                                                                                                                                 |
|--------------------------------------------------------|-------------------------------------------------------------------------------------------------------------------------------------------------|
| Empirical formula                                      | C <sub>42</sub> H <sub>50</sub> CoN <sub>2</sub> O <sub>2</sub> S <sub>2</sub> , CHCl <sub>3</sub>                                              |
| Formula weight                                         | 857.26                                                                                                                                          |
| CCDC Number                                            | 1468751                                                                                                                                         |
| Crystal habit, colour                                  | Block, violet                                                                                                                                   |
| Crystal size, mm <sup>3</sup>                          | 0.24×0.18×0.14                                                                                                                                  |
| Temperature, <i>T</i>                                  | 293(2)                                                                                                                                          |
| Wavelength, $\lambda$ (Å)                              | 0.71073                                                                                                                                         |
| Crystal system                                         | monoclinic                                                                                                                                      |
| Space group                                            | <i>P</i> 21/ <i>c</i>                                                                                                                           |
| Unit cell dimensions                                   | <i>a</i> = 19.3263(9) Å<br><i>b</i> = 9.6193(4) Å<br><i>c</i> = 25.4228(11) Å<br>$\alpha$ = 90.00°, $\gamma$ = 108.384(5)°,<br>$\beta$ = 90.00° |
| Volume, <i>V</i> (Å <sup>3</sup> )                     | 4485.0(4)                                                                                                                                       |
| <i>Z</i>                                               | 4                                                                                                                                               |
| Calculated density, Mg·m <sup>-3</sup>                 | 1.270                                                                                                                                           |
| Absorption coefficient, $\mu$ (mm <sup>-1</sup> )      | 0.690                                                                                                                                           |
| <i>F</i> (000)                                         | 1796                                                                                                                                            |
| $\theta$ range for data collection                     | 2.99° to 25.00°                                                                                                                                 |
| Limiting indices                                       | -22 ≤ <i>h</i> ≤ 12, -11 ≤ <i>k</i> ≤ 10,<br>-26 ≤ <i>l</i> ≤ 30                                                                                |
| Reflection collected/unique                            | 19539/7888 [ <i>R</i> (int)=0.0280]                                                                                                             |
| Completeness to $\theta$                               | 99.7% ( $\theta$ = 25.00°)                                                                                                                      |
| Max. and min. transmission                             | 0.908/0.862                                                                                                                                     |
| Refinement method                                      | 'SHELXL-2014/7'                                                                                                                                 |
| Data/restraints/parameters                             | 7908/211/578                                                                                                                                    |
| Goodness-of-fit on <i>F</i> <sup>2</sup>               | 1.035                                                                                                                                           |
| Final <i>R</i> indices [ <i>I</i> >2sigma( <i>I</i> )] | <i>R</i> 1 = 0.0577, <i>wR</i> 2 = 0.1491                                                                                                       |
| <i>R</i> indices (all data)                            | <i>R</i> 1 = 0.0829, <i>wR</i> 2 = 0.1653                                                                                                       |
| Largest diff. peak and hole                            | 0.543 and -0.477 e·Å <sup>-3</sup>                                                                                                              |

**Table S3:** Coordinates for the geometrical optimized structure of complex 1.

|    |             |             |             |
|----|-------------|-------------|-------------|
| Co | 0.17393000  | 0.33871300  | -0.96389800 |
| N  | 1.26403800  | -0.63367500 | 0.16642300  |
| N  | -1.40124600 | -0.69707700 | -1.03425200 |
| O  | 1.63362000  | 1.54269600  | -1.02114800 |
| O  | -1.01194500 | 1.74574200  | -0.63230900 |
| C  | 2.72029700  | 1.06213200  | -0.48741000 |

|   |             |             |             |
|---|-------------|-------------|-------------|
| C | 4.00089600  | 1.71021900  | -0.51582300 |
| C | 5.04057500  | 1.04997000  | 0.14613500  |
| C | 4.90791800  | -0.19580000 | 0.83956100  |
| C | 3.65676300  | -0.81374400 | 0.86457100  |
| C | 2.56401400  | -0.20248500 | 0.20179600  |
| H | 6.02929500  | 1.52270100  | 0.13397000  |
| H | 3.49838400  | -1.76401100 | 1.39303800  |
| C | -4.49759700 | 1.66771200  | 0.39548900  |
| C | -3.21885600 | 2.21380900  | 0.25165100  |
| C | -2.22403900 | 1.35160100  | -0.31940400 |
| C | -2.52610900 | -0.03073900 | -0.60927100 |
| C | -3.85927000 | -0.50517900 | -0.49404100 |
| C | -4.85254600 | 0.33558400  | 0.01242100  |
| H | -5.28947200 | 2.30949300  | 0.80477800  |
| H | -4.10375400 | -1.52404400 | -0.80714600 |
| C | 6.10463400  | -0.87170200 | 1.54455400  |
| C | 6.37315200  | -2.24419200 | 0.87989600  |
| H | 7.22926700  | -2.75300200 | 1.37060900  |
| H | 5.49506200  | -2.91672400 | 0.95355400  |
| H | 6.61618300  | -2.12461900 | -0.19562200 |
| C | 7.39438600  | -0.03357200 | 1.45436400  |
| H | 7.27965600  | 0.96029400  | 1.93288500  |
| H | 8.21798700  | -0.55972200 | 1.97809800  |
| H | 7.71837200  | 0.12324100  | 0.40559600  |
| C | 5.76996500  | -1.08220200 | 3.04077800  |
| H | 6.61820300  | -1.57317400 | 3.56195800  |

|   |             |             |             |
|---|-------------|-------------|-------------|
| H | 5.57105000  | -0.11446200 | 3.54437400  |
| H | 4.87656000  | -1.72311200 | 3.17928600  |
| C | 4.18326900  | 3.05342800  | -1.24237300 |
| C | 3.82093700  | 2.88168200  | -2.73883300 |
| H | 2.77258500  | 2.55193200  | -2.86455100 |
| H | 3.94619900  | 3.84670500  | -3.27286200 |
| H | 4.48320200  | 2.13521800  | -3.22348300 |
| C | 5.63401300  | 3.56273100  | -1.15376900 |
| H | 5.95284800  | 3.73923800  | -0.10590400 |
| H | 6.35332000  | 2.85923500  | -1.62132400 |
| H | 5.71905100  | 4.52829000  | -1.69196700 |
| C | 3.25523500  | 4.11481500  | -0.59948000 |
| H | 2.19309200  | 3.81192800  | -0.66460800 |
| H | 3.51089800  | 4.26833300  | 0.46913000  |
| H | 3.37265900  | 5.08762700  | -1.12114100 |
| C | -2.87426500 | 3.66241800  | 0.64103400  |
| C | -4.07680500 | 4.39005300  | 1.27074800  |
| H | -3.77832000 | 5.42004600  | 1.55241500  |
| H | -4.93004200 | 4.47566700  | 0.56700600  |
| H | -4.43491200 | 3.88536200  | 2.19166800  |
| C | -2.44050900 | 4.44789100  | -0.62233900 |
| H | -1.55381900 | 3.98627600  | -1.09579500 |
| H | -3.26005600 | 4.47746800  | -1.36952300 |
| H | -2.18803300 | 5.49443100  | -0.35086800 |
| C | -1.71835400 | 3.65520500  | 1.67232100  |
| H | -2.01375200 | 3.11534100  | 2.59590400  |

|   |             |             |             |
|---|-------------|-------------|-------------|
| H | -0.81471900 | 3.16930100  | 1.25894700  |
| H | -1.45493900 | 4.69571900  | 1.95557800  |
| C | -6.31597400 | -0.12420100 | 0.17470200  |
| C | -6.52275800 | -1.58104300 | -0.27968100 |
| H | -6.26975200 | -1.72130800 | -1.35006100 |
| H | -5.91274100 | -2.29015800 | 0.31633000  |
| H | -7.58579900 | -1.86859700 | -0.14935200 |
| C | -7.23436400 | 0.78386400  | -0.67912600 |
| H | -8.29476200 | 0.47415400  | -0.56994300 |
| H | -7.16355200 | 1.84766900  | -0.37681800 |
| H | -6.96645900 | 0.72082400  | -1.75336600 |
| C | -6.72818000 | -0.02014200 | 1.66342000  |
| H | -6.64235700 | 1.01568400  | 2.04830300  |
| H | -7.78370600 | -0.33756100 | 1.79577100  |
| H | -6.09444400 | -0.67184000 | 2.29946600  |
| S | -0.53456300 | -0.27174200 | 2.42635900  |
| S | 0.72695500  | -0.61091200 | -2.85335600 |
| C | -0.46414200 | -3.10063800 | 2.36330800  |
| C | -0.03001200 | -1.87083200 | 1.83225600  |
| C | 0.88828700  | -1.87059600 | 0.74442200  |
| C | 1.36187200  | -3.09172800 | 0.22623300  |
| C | 0.92911900  | -4.30972100 | 0.76902900  |
| C | 0.01553800  | -4.30900200 | 1.83483500  |
| H | -1.19500000 | -3.11257800 | 3.18448100  |
| H | 2.05382700  | -3.06412600 | -0.62800000 |
| H | 1.29185500  | -5.25782500 | 0.34528000  |

|   |             |             |             |
|---|-------------|-------------|-------------|
| H | -0.34056900 | -5.26061200 | 2.25829500  |
| C | -1.32043100 | -1.93425100 | -1.65460700 |
| C | -0.26615500 | -2.02981300 | -2.62567000 |
| C | -0.09522200 | -3.21967400 | -3.36956700 |
| C | -0.93773600 | -4.30991700 | -3.14426500 |
| C | -1.94819300 | -4.23668100 | -2.15818700 |
| C | -2.14381900 | -3.06717900 | -1.42162300 |
| H | 0.71229800  | -3.27407500 | -4.11564000 |
| H | -0.79807400 | -5.23723500 | -3.72050500 |
| H | -2.57636300 | -5.11644900 | -1.95164600 |
| H | -2.89267800 | -3.04581900 | -0.62021200 |
| C | -1.71150300 | -0.67336700 | 3.73404900  |
| C | -2.96215900 | -0.26689600 | 3.59351900  |
| H | -3.55602800 | 0.26158600  | 2.83225100  |
| H | -1.31632100 | -1.17463900 | 4.63728000  |

## References:

1. (a) CrysAlisPro, Oxford Diffraction Ltd., Version 1, 171. 33. 34d [release 27-02-2009 CrysAlis 171. NET]; (b) G. M. Sheldrick, *Acta Crystallogr.* 2008, **A64**, 112; (c) L. J. Farrugia, *J. Appl. Crystallogr.* 2012, **45**, 849.
2. Frisch, M. J. GAUSSIAN 09(Revision D.02), Gaussian, Inc., Wallingford, CT, 2009.
3. Y. Zhao, D.G. Truhlar, *Theor Chem Acc.* 2006, **120**, 215.
4. Perdew, J. P.; Burke, K.; Ernzerhof, M. *Phys. Rev. Lett.* 1996, **77**, 3865.
5. A. Schafer, C. Huber and R. Ahlrichs, *J. Chem. Phys.*, 1994, **100**, 5829.
6. NBO Version 3.1, E. D. Glendening, A. E. Reed, J. E. Carpenter, and F. Weinhold.
7. Khanmohammadi, H.; Rezaeian, K.; Amini, M. M.; Ng, S. W. *Dyes and Pigments*, 2013, **98**, 557.
